# Supplementary material
Source: PubMed Central journal article supplement (PMC7197870)
Supplement: joces-133-236778-s1.pdf [file joces-133-236778-s1.pdf]

## Supplementary Figures

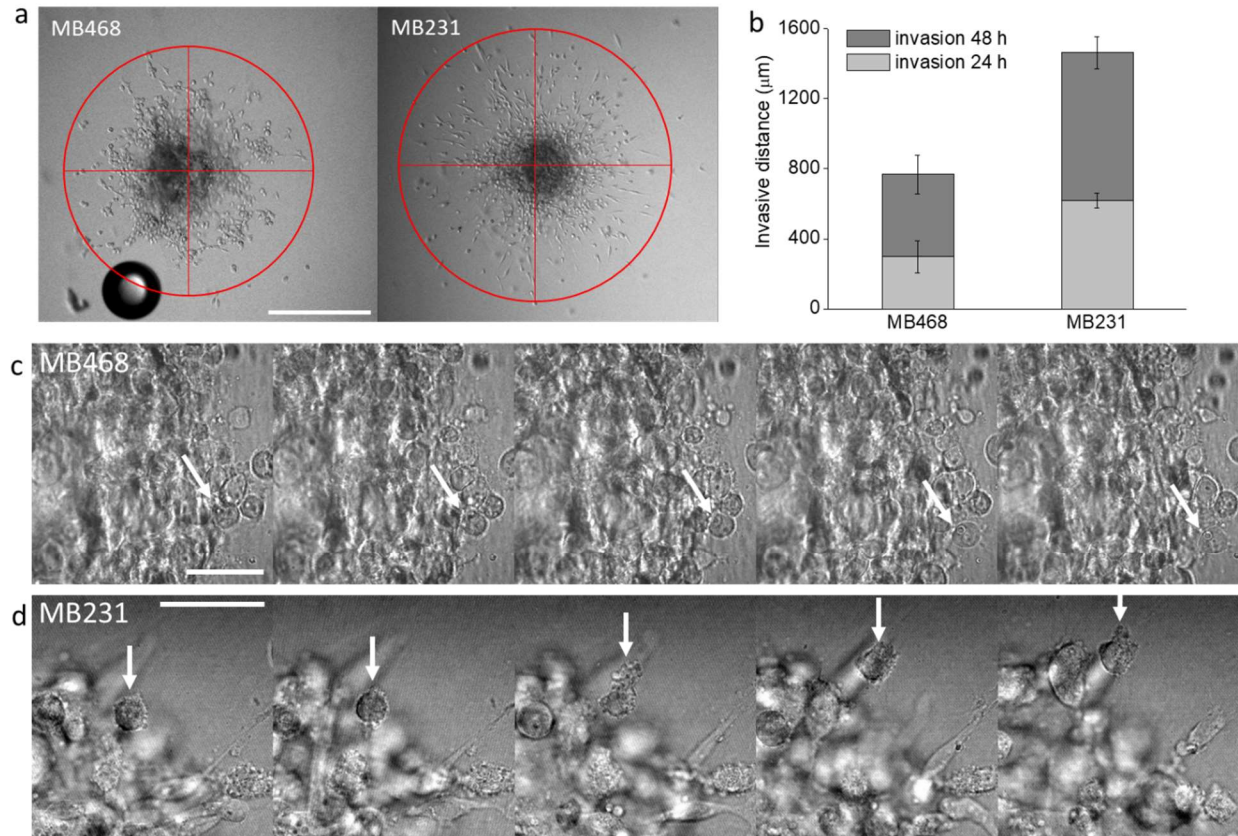

**Figure S1.** (a) Representative transmitted light images of (left) an MDA-MB-468 spheroid and (right) an MDA-MB-231 spheroid invading in a collagen I gel at 24 h. Red circle represents invasive distance as described in Materials and Methods. Scale bars = 500 μm. (b) MDA-MB-468 and MDA-MB-231 multicellular tumor spheroid invasion in 3D collagen I gels at t = 24 h and t = 48 h. Mean values of invasive distance ± SD are shown; n (MDA-MB-468) = 12, n (MDA-MB-231) = 9. (c, d) Transmitted light time-lapse images of spheroids invading in 1 mg/ml 3D collagen I with (c) MDA-MB-468 cells showing round cell invasion and (d) MDA-MB-231 cells showing dynamic interconversion between elongated and round cell morphology of invading cells. Images are (c) 20 min apart starting at t ≈ 7 h or (d) 30 min apart starting at t ≈ 10.5 h after collagen embedding of the spheroids. Arrows indicate emigrating bleb-bearing cells. Scale bars = 50 μm. Images in (c, d) are obtained from M1 and M2, respectively.

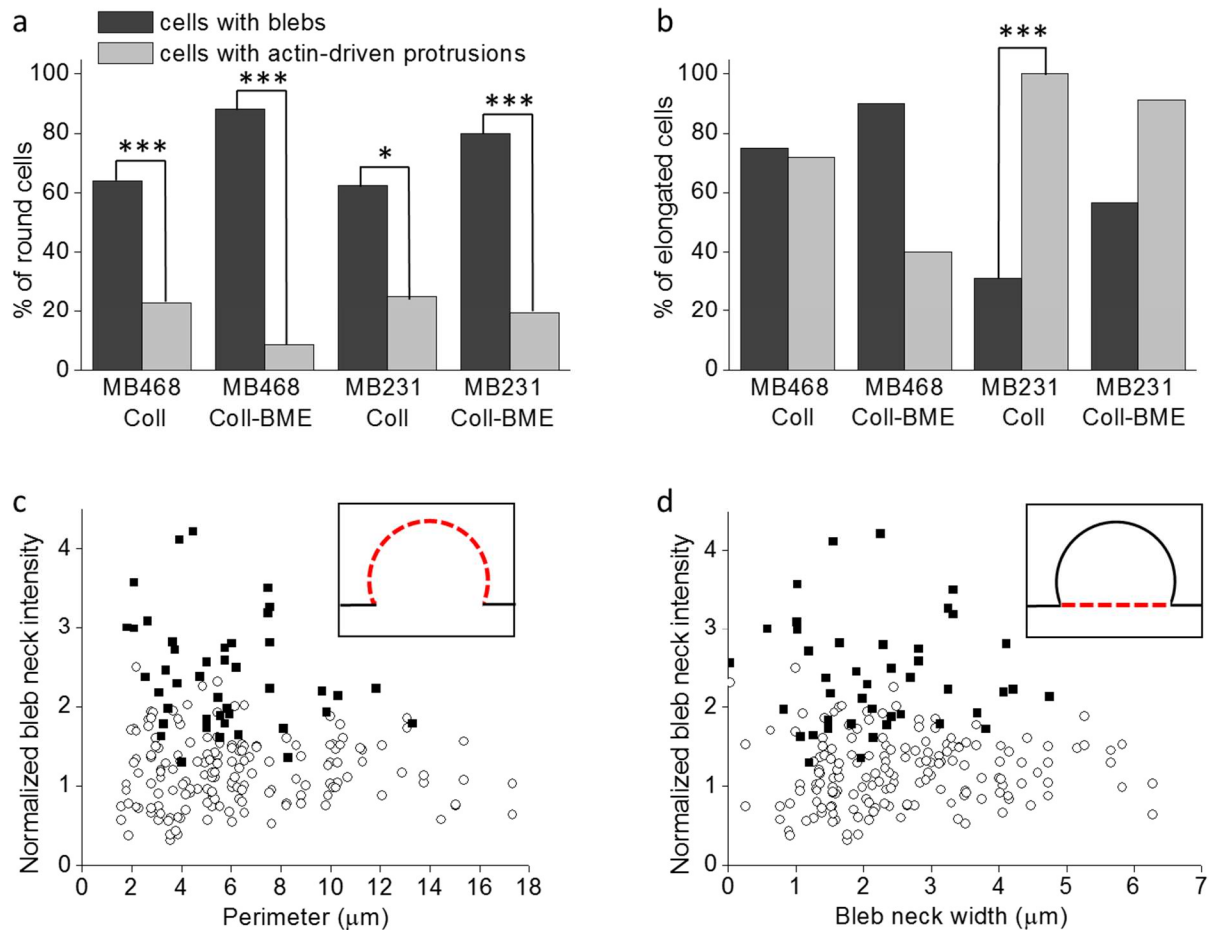

**Figure S2.** (a, b) Correlative analysis of the occurrence of membrane blebs and actin-driven protrusions in MDA-MB-468 and MDA-MB-231 cells of (a) round cells ( $c \geq 0.75$ ) and (b) elongated cells ( $c < 0.75$ ) embedded in 3D 1 mg/ml collagen I (Coll) or the composite 1 mg/ml collagen I + 3 mg/ml BME (Coll-BME) matrices. Totals may be more than 100% since some cells have both at least one bleb and at least one actin-driven protrusion. Data set is the same as that used for Fig. 1 in the main text. Data was pooled from 3-4 statistically identical biological replicates.  $n = 149, 103, 117, 122$  for MDA-MB-468 Coll, MDA-MB-468 Coll-BME, MDA-MB-231 Coll, and MDA-MB-231 Coll-BME, respectively. Differences were assessed by t-tests between percents. In this and all subsequent figures in which statistical analysis is performed, the analyses are conducted at  $\alpha = 0.05$ , and significant different are marked by \* ( $p < 0.05$ ), \*\* ( $p < 0.01$ ), \*\*\* ( $p < 0.001$ ) and insignificant by †. (c, d) Mean normalized fluorescence intensity of total  $\beta 1$  integrin staining at individual bleb necks of the same dispersed MDA-MB-231 cells used in the analysis shown in Fig. 4 of the main text plotted against (c) perimeter of the bleb or (d) the width of the bleb neck. Blebs bearing clusters or no clusters are represented by filled and open symbols, respectively. The distributions of bleb perimeters and bleb neck widths of blebs with and without  $\beta 1$  clusters were compared by KS test and t-test between percents and were found to be statistically equivalent.

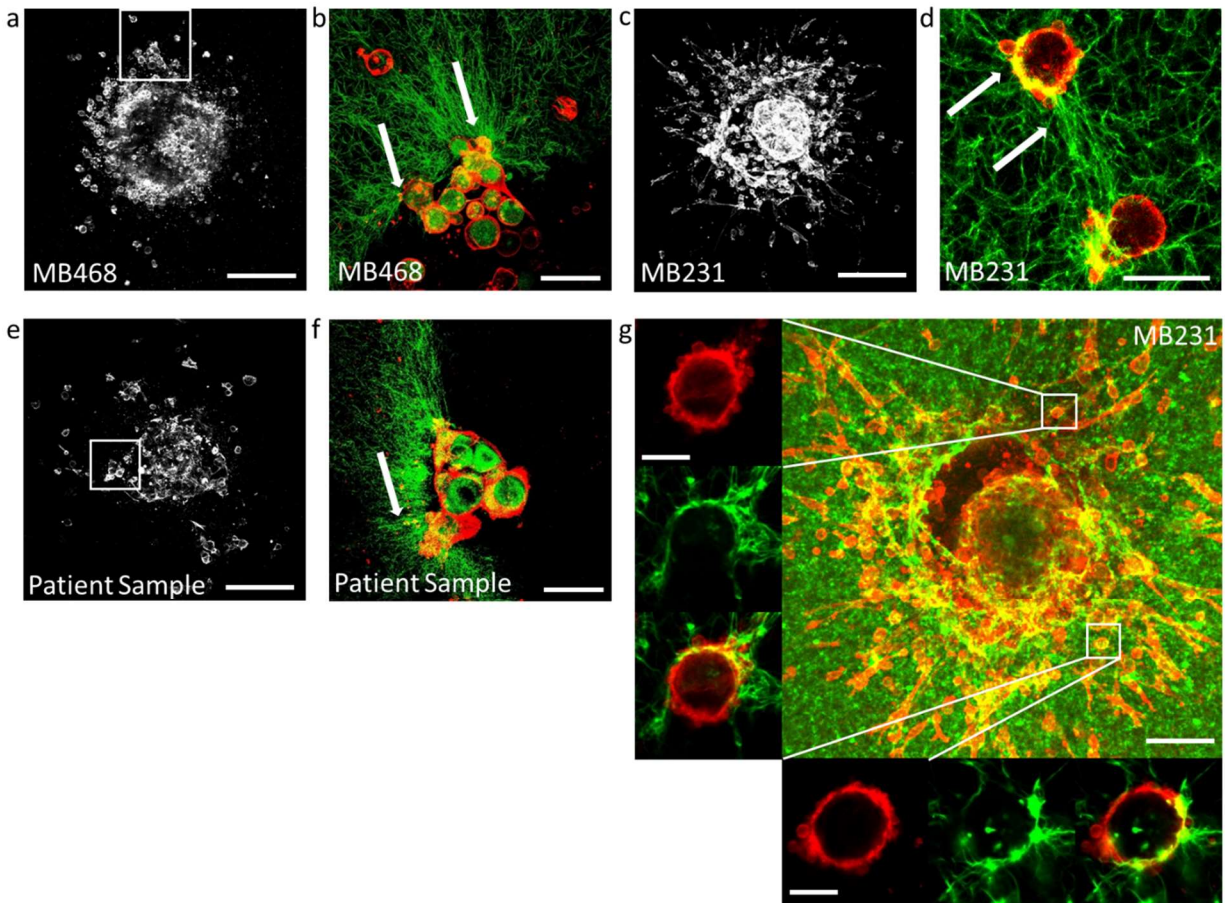

**Figure S3.** (a, c, e, g) Representative confocal fluorescence microscopy maximum projections over  $\approx 50 \mu\text{m}$  of (a, c, e) phalloidin-stained (a) MDA-MB-468 (c) MDA-MB-231, and (e) patient-derived breast cancer organoid and (g) CellMask-stained MDA-MB-231 spheroid at  $t = 24 \text{ h}$ , each in  $1 \text{ mg/ml}$  collagen I. White squares indicate regions presented in higher magnification in b, f, and g. (b, d, f) Representative images of phalloidin-stained (b) MDA-MB-468, (d) MDA-MB-231, and (f) patient-derived breast cancer cells (red) invading as clusters or individual cells and (green) their immediate collagen environment. (g) Representative images of (red) CellMask stained MDA-MB-231 cells showing polarized bleb bearing regions and (green) their immediate collagen environment. White arrows indicate sites of collagen fiber alignment adjacent to bleb-bearing regions of cells, showing efficient invasion of round bleb-bearing cells into the collagen I matrix accompanied by extensive collagen re-organization. In (b) and (f), dark regions that are apparently devoid of collagen are caused by out of plane portions of the spheroid or organoid. (a, c, e) Scale bar =  $200 \mu\text{m}$ ; (g) Scale bars =  $100 \mu\text{m}$  on large image and  $10 \mu\text{m}$  on the small images; (b, f) Scale bar =  $50 \mu\text{m}$ ; (d) Scale bar =  $10 \mu\text{m}$ .

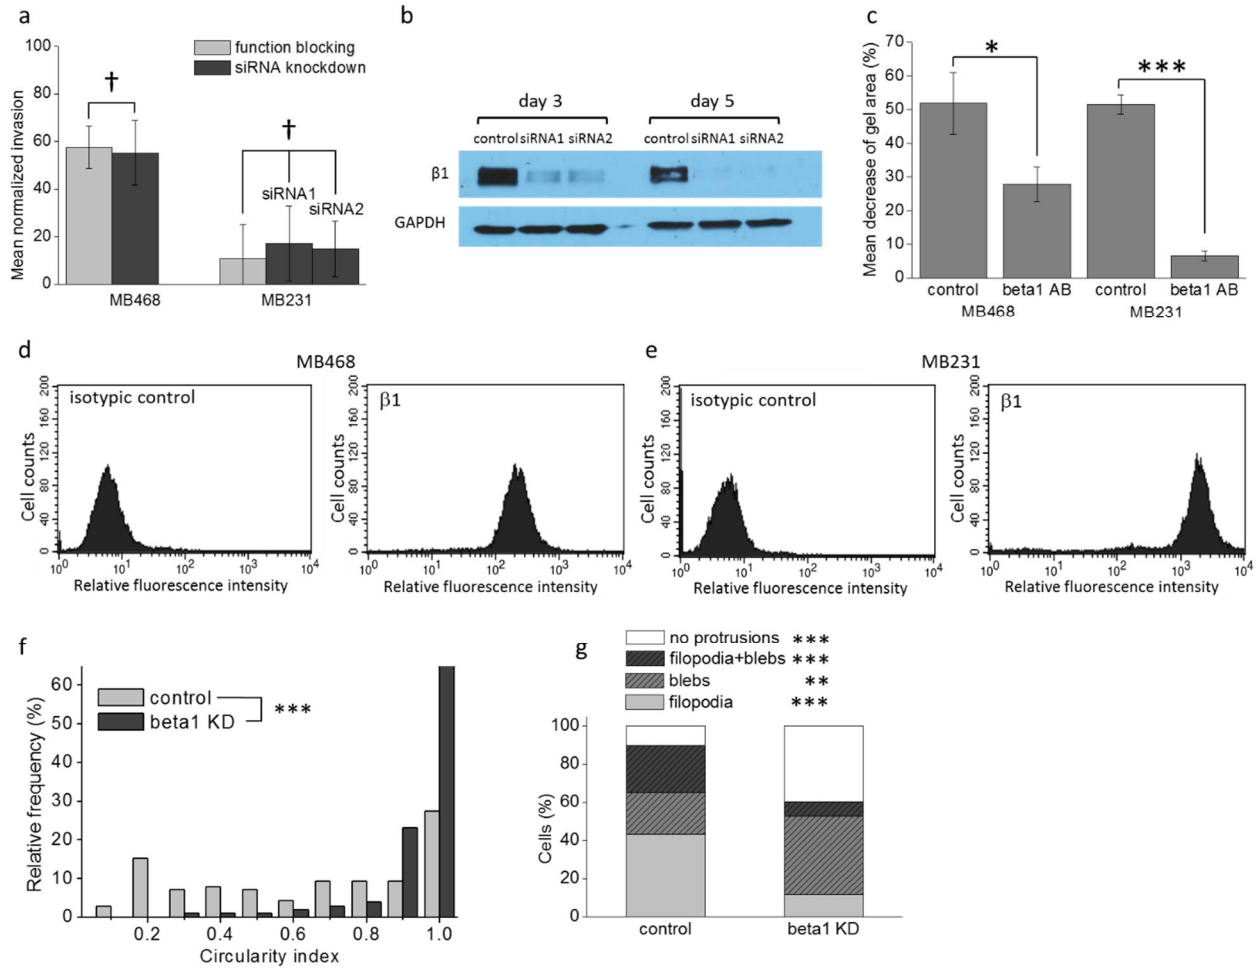

**Figure S4.** (a) Comparison of invasion reduction through function blocking antibody (AB) and siRNA-mediated integrin knockdown, with two siRNAs used for the MDA-MB-231 cells (siRNA1 and siRNA2). Mean invasion relative to solvent or non-targeting siRNA controls  $\pm$  SD for MDA-MB-468 and MDA-MB-231 in pure collagen at  $t = 24$  h is shown.  $n = 11$  (MDA-MB-468 function blocking AB and control), 12 (MDA-MB-468 siRNA1 and control), 10 and 11 (MDA-MB-231 function blocking AB and control), 13 (MDA-MB-231 siRNA1 and control) and 13 and 12 (MDA-MB-231 siRNA2 and control).  $t$ -tests were used to compare normalized invasion under the function blocking antibody- and siRNA-mediated integrin inhibition (within one cell line) and the resulting inhibitory effects were found to be statistically equal. (b) SDS-PAGE and Western Blot of cell lysates from MDA-MB-231 cells transfected with either control, siRNA1, or siRNA 2 and harvested on either day 3 or day 5. Equal amounts of protein were loaded for each condition. Western Blot was probed against  $\beta 1$  integrin to show knockdown efficiency, and GAPDH was used as a control to show equal loading. siRNA1 is used at all other points in this paper. (c) Collagen gel contraction by MDA-MB-468 and MDA-MB-231 cells under antibody-mediated integrin inhibition compared to control shown as mean decrease of the gel area  $\pm$  SD at  $t = 24$  h. Experiment was performed in biological triplicate. (d, e)  $\beta 1$  integrin expression of (d) MDA-MB-468 and (e) MDA-MB-231 cells were subjected to fluorescent labeling of cell surface  $\beta 1$  integrin via sequential incubation with  $\beta 1$  integrin primary antibody and fluorescently labeled secondary antibody and fluorescence was measured by flow cytometry. Cells treated with secondary antibody only were used as a negative control (left panels).  $n = 10000$  cells for each cell line and condition. (f, g) Analysis of changes in cellular morphology and protrusion type of MDA-MB-231 cells embedded in collagen I matrices following siRNA-mediated  $\beta 1$  integrin



knockdown in comparison to control group. (f) Histogram of cell circularity of  $\beta 1$  integrin knockdown cells to control cells. Differences in distributions were assessed by KS analysis (g) Percentage of both  $\beta 1$  integrin knockdown and control cells bearing at least one protrusion from each class. Actin polymerization-driven protrusions are summarized under “filopodia.” Differences in occurrence of each protrusion type were assessed by t-tests. Data was pooled from 3 statistically identical biological replicates.  $n = 138$  and  $104$  for the control group and the siRNA knockdown, respectively.

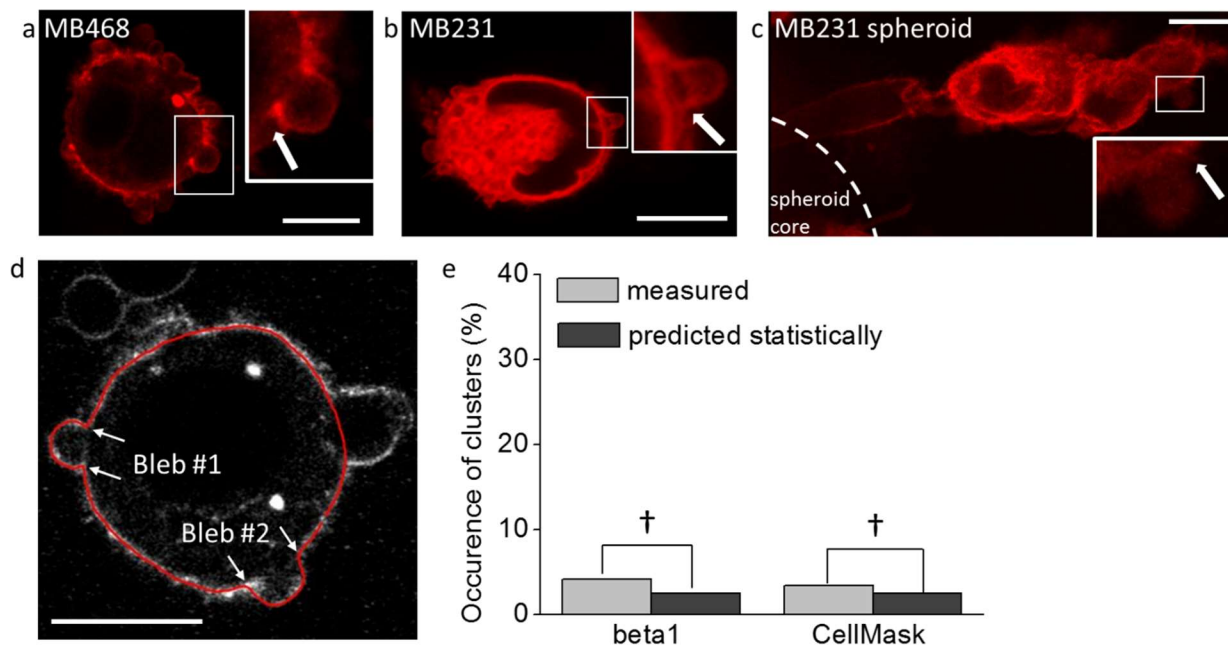

**Figure S5.** (a-c) CellMask images of the 1 mg/ml collagen I-embedded (a) MDA-MB-231 cell (b) MDA-MB-468 cell and (c) the edge of an MDA-MB-231 spheroid shown for each of the three images also shown in Fig. 5 in the main text. (c) White dashed lines show the edge of the spheroid. (d) Representative example of region selection for cluster analysis. Image shows a single confocal slice of a cell with the region of interest (ROI) shown in red. A more complete explanation of the protocol can be found in Materials and Methods in the main text. In (a-d), arrows indicate bleb necks.  $t = 6$  h. Scale bar =  $10 \mu\text{m}$ . (e) Analysis of integrin distribution on the cell membrane of collagen I-embedded MDA-MB-231 cells immunostained for cell surface total  $\beta 1$  integrins and CellMask. The measured occurrences of  $\beta 1$  integrin and CellMask clusters on the bulk cell membrane was compared to values predicted for normal distributions by t-test between percents and were found to be statistically equal. Data was pooled from 3 statistically identical biological replicates.  $n = 48$  (individual, non-overlapping confocal slices were treated as independent samples).

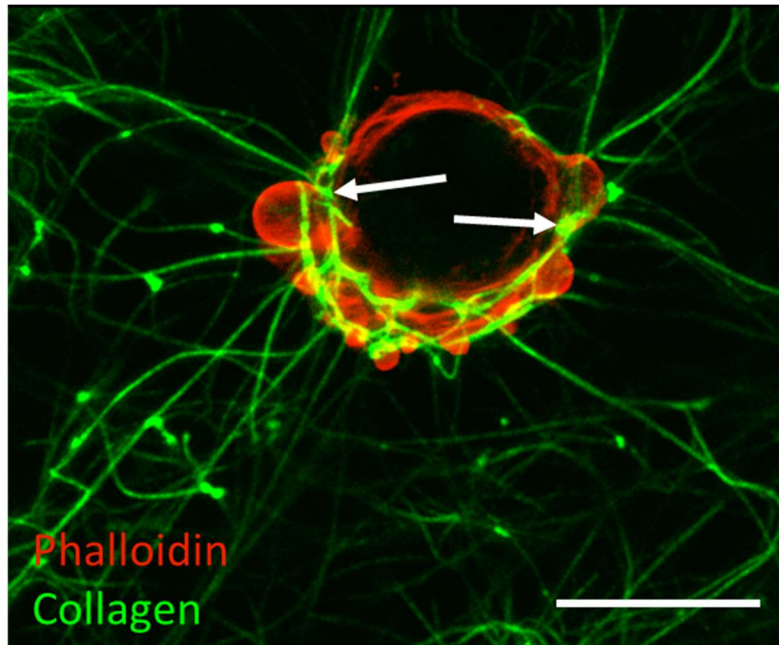

**Figure S6.** Representative image of an MDA-MB-231 cell stained with (red) phalloidin in a (green) 1 mg/ml collagen I matrix. Image shows polarized bleb formation as well as collagen alignment at bleb necks (white arrows).  $t = 6$  h. Scale bar = 10  $\mu\text{m}$ .

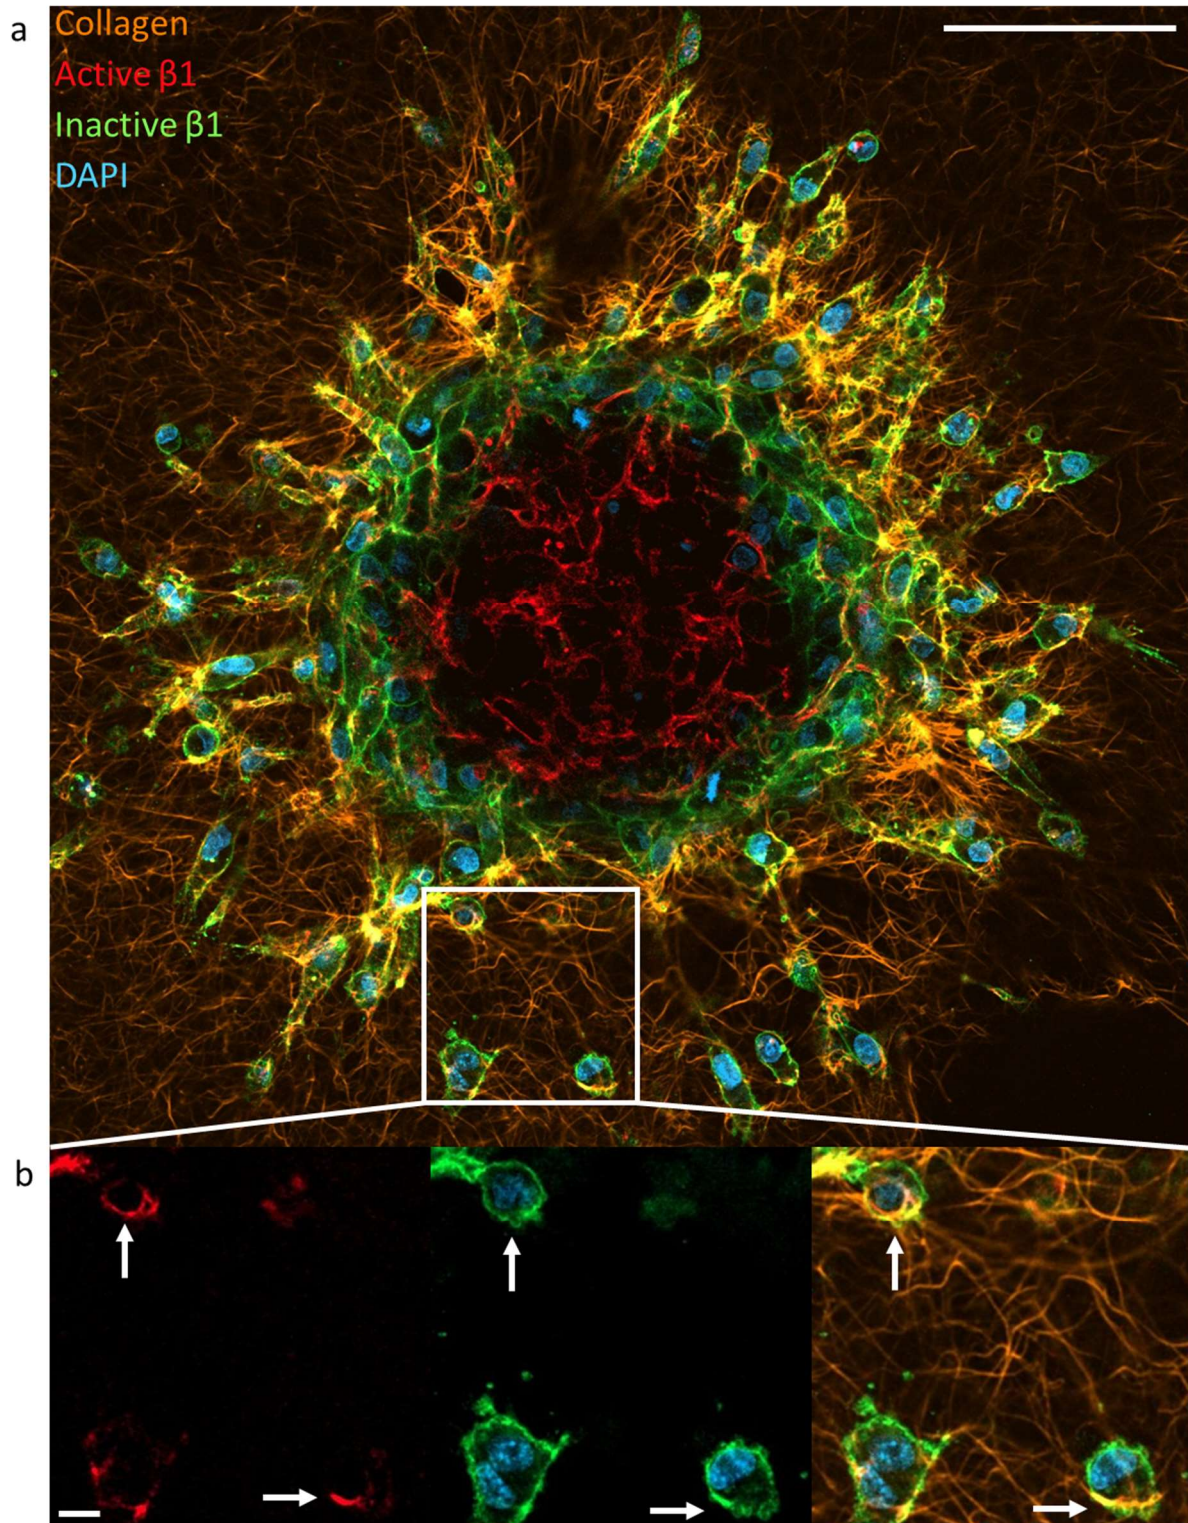

**Figure S7.** Representative CFM image of an MDA-MB-231 spheroid triple stained for (red) active  $\beta 1$  integrin, (green) inactive  $\beta 1$  integrin and (blue) DAPI implanted into an (orange) 1 mg/ml collagen I matrix showing round, bleb-bearing cells invading. (a) Spheroid core and invading cells. White square shows



region of interest, which is represented at higher magnification below. (b) Higher magnification images collectively show the accumulation of (left) active  $\beta 1$  integrin, (center) polarized, bleb-bearing cells, and (right) accumulation of collagen overlapping with both the accumulation of active  $\beta 1$  integrin and the polarized distribution of blebs. White arrows note round, bleb-bearing cells with active  $\beta 1$  integrin and collagen accumulation.  $t = 6$  h. (a) Scale bar = 100  $\mu\text{m}$ ; (b) Scale bar = 10  $\mu\text{m}$ .

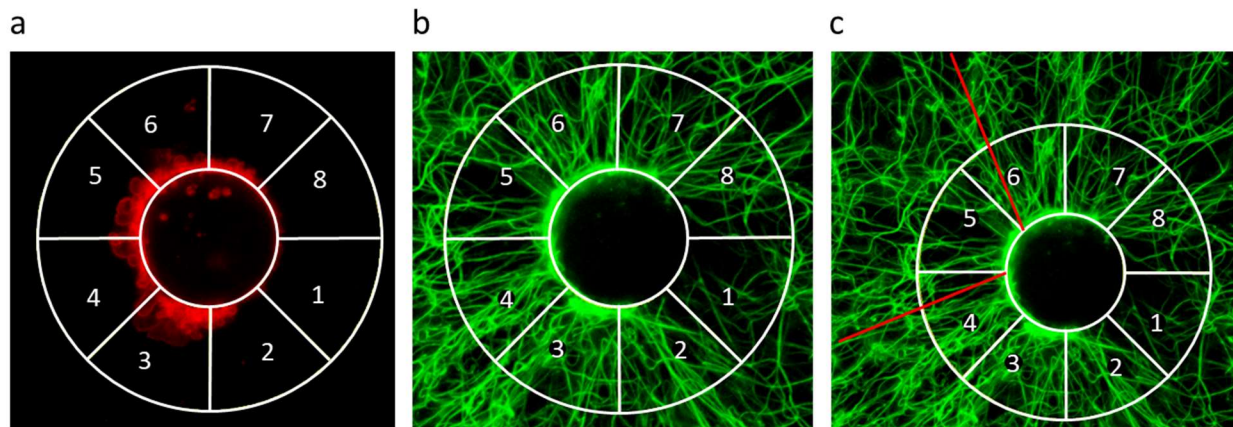

**Figure S8.** Representative example of segmentation for collagen orientation analysis. Measurement regions surrounding a cell for the (a) phalloidin (red) channel and (b) collagen (green) channel. Panel (a) shows the division of the cell into non-blebby regions (#1 and #8) and blebby regions (#2-7). The red lines in (c) indicate the 90° angular window corresponding to collagen alignment for region 5.



## Supplementary Table

**Table S1.** Details of statistical analyses performed.

| Data                                         | Figure                                                                                                       | Test For (Test Used)                                                                                                         | Software Used                                             | Test Details ( $\alpha = 0.05$ )                                                                       | Meaning of Results                                                     |                              |
|----------------------------------------------|--------------------------------------------------------------------------------------------------------------|------------------------------------------------------------------------------------------------------------------------------|-----------------------------------------------------------|--------------------------------------------------------------------------------------------------------|------------------------------------------------------------------------|------------------------------|
| <b>Cell Morphology</b>                       |                                                                                                              |                                                                                                                              |                                                           |                                                                                                        |                                                                        |                              |
| <b>Circularity Parameter</b>                 | 1b                                                                                                           | 1. Compare distributions by date (KS Test)                                                                                   | XLSTAT                                                    | 468 Coll I $p > 0.05$<br>468 Coll-BME $p > 0.05$ excluding one pair where $p = 0.02$                   | All dates are equal<br>All dates are equal except for one date pairing |                              |
|                                              |                                                                                                              | 2. Compare distributions by matrix (KS Test)                                                                                 | R                                                         | $p > 0.05$                                                                                             | Equal circularity                                                      |                              |
|                                              | 1d                                                                                                           | 1. Compare distributions by date (KS Test)                                                                                   | XLSTAT                                                    | 231 Coll I $p > 0.05$<br>231 Coll-BME $p > 0.05$ excluding two pair where $p = 0.026$ and $p < 0.0001$ | All dates are equal<br>All dates are equal except for one date pairing |                              |
|                                              |                                                                                                              | 2. Compare distributions by matrix (KS Test)                                                                                 | R                                                         | $p < 0.0001$                                                                                           | 231 Coll-BME is more round than 231 Coll I                             |                              |
|                                              | S4f                                                                                                          | 1. Compare distributions by date (KS Test)                                                                                   | XLSTAT                                                    | 231 $\beta 1$ KD $p > 0.05$<br>231 Scrambled $p > 0.05$                                                | All dates are equal<br>All dates are equal                             |                              |
|                                              |                                                                                                              | 2. Compare distributions by matrix (KS Test)                                                                                 | R                                                         | $p < 0.0001$                                                                                           | 231 $\beta 1$ KD is more round than 231 Scrambled                      |                              |
| <b>Protrusions</b>                           | 1c                                                                                                           | 1. Compare Occurrence of protrusions by date (Single Factor ANOVA)                                                           | Excel                                                     | 468 Coll I $p > 0.05$                                                                                  | All dates are equal                                                    |                              |
|                                              |                                                                                                              |                                                                                                                              |                                                           | 468 Coll-BME $p > 0.05$                                                                                | All dates are equal                                                    |                              |
|                                              |                                                                                                              | 2. Compare occurrence of protrusions by matrix (Single Factor ANOVA)                                                         | Excel                                                     | Blebs $p < 0.0001$                                                                                     | 468 Coll-BME has more                                                  |                              |
|                                              |                                                                                                              |                                                                                                                              |                                                           | Actin-Driven $p < 0.0001$<br>Both $p = 0.037$<br>Neither $p = 0.037$                                   | 468 Coll I has more<br>468 Coll I has more                             |                              |
|                                              | 1e                                                                                                           | 1. Compare Occurrence of protrusions by date (Single Factor ANOVA)                                                           | Excel                                                     | 231 Coll I $p > 0.05$                                                                                  | All dates are equal                                                    |                              |
|                                              |                                                                                                              |                                                                                                                              |                                                           | 231 Coll-BME $p > 0.05$                                                                                | All dates are equal                                                    |                              |
|                                              |                                                                                                              | 2. Compare occurrence of protrusions by matrix (Single Factor ANOVA)                                                         | Excel                                                     | Blebs $p < 0.0001$                                                                                     | 231 Coll-BME has more                                                  |                              |
|                                              |                                                                                                              |                                                                                                                              |                                                           | Actin-Driven $p < 0.0001$<br>Both $p > 0.05$<br>Neither $p = 0.001$                                    | 231 Coll I has more<br>231 Coll I has more<br>231 Coll-BME has more    |                              |
|                                              | S4g                                                                                                          | 1. Compare Occurrence of protrusions by date (Single Factor ANOVA)                                                           | Excel                                                     | 231 $\beta 1$ KD $p > 0.05$                                                                            | All dates are equal                                                    |                              |
|                                              |                                                                                                              |                                                                                                                              |                                                           | 231 Scrambled $p > 0.05$                                                                               | All dates are equal                                                    |                              |
|                                              |                                                                                                              | 2. Compare occurrence of protrusions by matrix (Single Factor ANOVA)                                                         | Excel                                                     | Blebs $p = 0.001$                                                                                      | $\beta 1$ KD has more                                                  |                              |
|                                              |                                                                                                              |                                                                                                                              |                                                           | Actin-Driven $p < 0.0001$<br>Both $p = 0.0002$<br>Neither $p < 0.0001$                                 | Scrambled has more<br>Scrambled has more<br>$\beta 1$ KD has more      |                              |
| 6i                                           | 1. Comparison of Percents (Two Sample t-test between Percents)                                               | Statistics Calculator                                                                                                        | Clustered Blebs $p < 0.0001$<br>Single Blebs $p < 0.0001$ | Control has more<br>$\beta 1$ KD has more                                                              |                                                                        |                              |
| <b>Circularity vs. Protrusions</b>           | S2a                                                                                                          | 1. Comparison of Percent of Round Cells Carrying Blebs vs. Actin-Driven Protrusions (One Sample t-test between percents)     | Statistics Calculator                                     | 468 Coll I $p < 0.0001$                                                                                | Blebs are more common                                                  |                              |
|                                              |                                                                                                              |                                                                                                                              |                                                           | 468 Coll-BME $p < 0.0001$                                                                              | Blebs are more common                                                  |                              |
|                                              |                                                                                                              |                                                                                                                              |                                                           | 231 Coll I $p = 0.0386$                                                                                | Blebs are more common                                                  |                              |
|                                              |                                                                                                              |                                                                                                                              |                                                           | 231 BME $p < 0.0001$                                                                                   | Blebs are more common                                                  |                              |
|                                              | S2b                                                                                                          | 1. Comparison of Percent of Elongated Cells Carrying Blebs vs. Actin-Driven Protrusions (One Sample t-test between percents) | Statistics Calculator                                     | 468 Coll I $p > 0.05$                                                                                  | Equal occurrence                                                       |                              |
|                                              |                                                                                                              |                                                                                                                              |                                                           | 468 Coll-BME $p > 0.05$<br>231 Coll I $p < 0.0001$<br>231 BME $p > 0.05$                               | Equal occurrence<br>Actin-driven are more common<br>Equal occurrence   |                              |
| <b>Spheroid Invasion and Gel Contraction</b> |                                                                                                              |                                                                                                                              |                                                           |                                                                                                        |                                                                        |                              |
| <b>Impact of <math>\beta 1</math></b>        |                                                                                                              | 1. Comparison of invasive distance under various $\beta 1$ inhibition (Two-Tailed t-test)                                    | Statistics Calculator                                     | 468 $p > 0.05$                                                                                         | Invasive distance is identical                                         |                              |
|                                              |                                                                                                              |                                                                                                                              |                                                           | 231 $p > 0.05$                                                                                         | Invasive distance is identical                                         |                              |
| <b>Various Inhibitors</b>                    | 3a                                                                                                           | 1. Comparison of invasive distance under various treatments (Wilcoxon Rank-Sum)                                              | R                                                         | 468 Coll I                                                                                             | Rac $p > 0.05$                                                         | Invasion is not impacted     |
|                                              |                                                                                                              |                                                                                                                              |                                                           |                                                                                                        | ROCK $p = 0.0014$                                                      | Invasion is decreased        |
|                                              |                                                                                                              |                                                                                                                              |                                                           |                                                                                                        | $\beta 1$ KD $p < 0.0001$                                              | Invasion is decreased        |
|                                              |                                                                                                              |                                                                                                                              |                                                           |                                                                                                        | MMPs $p = 0.0034$                                                      | Invasion is decreased        |
|                                              | 3b                                                                                                           | 1. Comparison of invasive distance under various treatments (Wilcoxon Rank-Sum)                                              | R                                                         | 231 Coll I                                                                                             | Rac $p = 0.0413$                                                       | Invasion is decreased        |
|                                              |                                                                                                              |                                                                                                                              |                                                           |                                                                                                        | ROCK $p = 0.0095$                                                      | Invasion is decreased        |
|                                              |                                                                                                              |                                                                                                                              |                                                           |                                                                                                        | $\beta 1$ KD #1 $p < 0.0001$                                           | Invasion is decreased        |
|                                              |                                                                                                              |                                                                                                                              |                                                           |                                                                                                        | $\beta 1$ KD #2 $p = 0.0002$                                           | Invasion is decreased        |
|                                              | 3c                                                                                                           | 1. Comparison of invasive distance under various treatments (Wilcoxon Rank-Sum)                                              | R                                                         | 231 Coll-BME                                                                                           | MMPs $p > 0.05$                                                        | Invasion is not impacted     |
|                                              |                                                                                                              |                                                                                                                              |                                                           |                                                                                                        | Rac $p < 0.0001$                                                       | Invasion is decreased        |
|                                              |                                                                                                              |                                                                                                                              |                                                           |                                                                                                        | ROCK $p < 0.0001$                                                      | Invasion is decreased        |
|                                              |                                                                                                              |                                                                                                                              |                                                           |                                                                                                        | $\beta 1$ KD $p = 0.0002$                                              | Invasion is decreased        |
| S4a                                          | 1. Comparison of function blocking $\beta 1$ antibody to $\beta 1$ siRNA knockdown (t test between percents) | Statistics Calculator                                                                                                        | 468                                                       | siRNA1 $p > 0.05$                                                                                      | Invasion is impacted equally                                           |                              |
|                                              |                                                                                                              |                                                                                                                              |                                                           | 231                                                                                                    | siRNA1 $p > 0.05$                                                      | Invasion is impacted equally |
|                                              | 2. Comparison of siRNA #1 to siRNA #2 (t-test between percents)                                              | Statistics Calculator                                                                                                        | 231                                                       | siRNA2 $p > 0.05$                                                                                      | Invasion is impacted equally                                           |                              |
|                                              |                                                                                                              |                                                                                                                              |                                                           | 231                                                                                                    | $p > 0.05$                                                             | Invasion is impacted equally |
| <b>Gel Contraction</b>                       | S4c                                                                                                          | 1. Comparison of Gel Contraction under $\beta 1$ antibody inhibition (Wilcoxon Rank-Sum)                                     | R                                                         | 231 $p = 0.0265$                                                                                       | KD decreases contraction                                               |                              |
|                                              |                                                                                                              |                                                                                                                              |                                                           | 468 $p = 0.0284$                                                                                       | KD decreases contraction                                               |                              |

| Data                                                                                                                   | Figure                | Test For (Test Used)                                                                                                   | Software Used         | Test Details ( $\alpha = 0.05$ ) |                                                 | Meaning of Results                                   |                                                |
|------------------------------------------------------------------------------------------------------------------------|-----------------------|------------------------------------------------------------------------------------------------------------------------|-----------------------|----------------------------------|-------------------------------------------------|------------------------------------------------------|------------------------------------------------|
| <b>Occurrence of <math>\beta 1</math> Clusters</b>                                                                     |                       |                                                                                                                        |                       |                                  |                                                 |                                                      |                                                |
| Removal of Outlier                                                                                                     | NA                    | 1. Removal of outlying bleb based on bleb perimeter (Two Tailed Grubb's Test for Outliers)                             | Excel                 | p = 0.0023                       |                                                 | Bleb is an outlier                                   |                                                |
| <b><math>\beta 1</math> vs CellMask Clusters at the Bleb Neck - 468</b>                                                | 4d                    | 1. Determination of Skew and Kurtosis of distributions (Skew and Kurtosis)                                             | Excel                 | $\beta 1$                        | Skew                                            | $\bar{s} = 1.223$                                    | Distribution is normal                         |
|                                                                                                                        |                       |                                                                                                                        |                       |                                  | Kurtosis                                        | $\bar{k} = 3.690$                                    | Distribution is normal                         |
|                                                                                                                        |                       | 2. Comparison of Occurrence of Clusters by Date (Two Sample t-test between percents)                                   | Statistics Calculator | $\beta 1$                        | Skew                                            | $\bar{s} = 0.764$                                    | Distribution is normal                         |
|                                                                                                                        |                       |                                                                                                                        |                       |                                  | Kurtosis                                        | $\bar{k} = 2.301$                                    | Distribution is normal                         |
|                                                                                                                        |                       | 3. Comparison of Occurrence of $\beta 1$ Clusters vs CellMask Clusters (One Sample t-test between Percents)            | Statistics Calculator | CellMask                         | p > 0.05                                        |                                                      | All dates are equal                            |
| p > 0.05                                                                                                               |                       |                                                                                                                        |                       |                                  | All dates are equal                             |                                                      |                                                |
| 4. Comparison of actual vs expected Occurrence of $\beta 1$ and CellMask Clusters (One Sample t-test between Percents) | Statistics Calculator | p < 0.0001                                                                                                             |                       | $\beta 1$ has more clusters      |                                                 |                                                      |                                                |
| 5. Comparison of actual vs expected Occurrence of $\beta 1$ and CellMask Clusters (One Sample t-test between Percents) | Statistics Calculator | $\beta 1$                                                                                                              | p < 0.0001            |                                  | There are more $\beta 1$ Clusters than expected |                                                      |                                                |
|                                                                                                                        |                       | CellMask                                                                                                               | p = 0.023             |                                  | There are more CellMask Clusters than expected  |                                                      |                                                |
| <b><math>\beta 1</math> vs CellMask Clusters at the Bleb Neck - 231</b>                                                | 4d                    | 1. Determination of Skew and Kurtosis of distributions (Skew and Kurtosis)                                             | Excel                 | $\beta 1$                        | Skew                                            | $\bar{s} = 0.715$                                    | Distribution is normal                         |
|                                                                                                                        |                       |                                                                                                                        |                       |                                  | Kurtosis                                        | $\bar{k} = 0.814$                                    | Distribution is normal                         |
|                                                                                                                        |                       | 2. Comparison of Occurrence of Clusters by Date (Two Sample t-test between percents)                                   | Statistics Calculator | CellMask                         | Skew                                            | $\bar{s} = 0.207$                                    | Distribution is normal                         |
|                                                                                                                        |                       |                                                                                                                        |                       |                                  | Kurtosis                                        | $\bar{k} = -0.001$                                   | Distribution is normal                         |
|                                                                                                                        |                       | 3. Comparison of Distribution by Date (Single Factor ANOVA)                                                            | Excel                 | $\beta 1$                        | p > 0.05                                        |                                                      | All dates are equal                            |
|                                                                                                                        |                       |                                                                                                                        |                       |                                  | p > 0.05                                        |                                                      | All dates are equal                            |
|                                                                                                                        |                       | 4. Comparison of Occurrence of $\beta 1$ Clusters vs CellMask Clusters (One Sample t-test between Percents)            | Statistics Calculator | CellMask                         | Skew                                            | p > 0.05                                             | All dates are equal                            |
|                                                                                                                        |                       |                                                                                                                        |                       |                                  | Kurtosis                                        | p > 0.05                                             | All dates are equal                            |
|                                                                                                                        |                       | 5. Comparison of actual vs expected Occurrence of $\beta 1$ and CellMask Clusters (One Sample t-test between Percents) | Statistics Calculator | CellMask                         | Skew                                            | p > 0.05                                             | All dates are equal                            |
|                                                                                                                        |                       |                                                                                                                        |                       |                                  | Kurtosis                                        | p > 0.05                                             | All dates are equal                            |
| 4. Comparison of Occurrence of $\beta 1$ Clusters vs CellMask Clusters (One Sample t-test between Percents)            |                       | Statistics Calculator                                                                                                  | p = 0.0012            |                                  | $\beta 1$ has more clusters                     |                                                      |                                                |
| 5. Comparison of actual vs expected Occurrence of $\beta 1$ and CellMask Clusters (One Sample t-test between Percents) |                       | Statistics Calculator                                                                                                  | $\beta 1$             | p = 0.028                        |                                                 | There are more $\beta 1$ Clusters than expected      |                                                |
| 5. Comparison of actual vs expected Occurrence of $\beta 1$ and CellMask Clusters (One Sample t-test between Percents) |                       | Statistics Calculator                                                                                                  | CellMask              | p > 0.05                         |                                                 | There are equal CellMask Clusters to expected        |                                                |
| <b><math>\beta 1</math> vs CellMask Clusters on the Bulk Membrane - 231</b>                                            | S5e                   | 1. Comparison of actual vs expected Occurrence of $\beta 1$ and CellMask Clusters (One Sample t-test between Percents) | Statistics Calculator | $\beta 1$                        | p > 0.05                                        |                                                      | There are equal $\beta 1$ Clusters to expected |
|                                                                                                                        |                       |                                                                                                                        |                       | CellMask                         | p > 0.05                                        |                                                      | There are equal CellMask Clusters to expected  |
| <b>Dependence of Bleb Size on <math>\beta 1</math> Cluster Occurrence - 231</b>                                        | S2c                   | 1. Dependence of bleb perimeter on the Occurrence of $\beta 1$ clusters (Two-Tailed t-test)                            | Excel                 | p > 0.05                         |                                                 | $\beta 1$ Clusters occur independently of perimeter  |                                                |
|                                                                                                                        | S2d                   | 1. Dependence of bleb neck width on the Occurrence of $\beta 1$ clusters (Two-Tailed t-test)                           | Excel                 | p > 0.05                         |                                                 | $\beta 1$ Clusters occur independently of neck width |                                                |
| <b><math>\beta 1</math> vs CellMask Clusters at the Bleb Neck - 231 Spheroids</b>                                      | 4d                    | 1. Determination of Skew and Kurtosis of distributions (Skew and Kurtosis)                                             | Excel                 | $\beta 1$                        | Skew                                            | $\bar{s} = 0.895$                                    | Distribution is normal                         |
|                                                                                                                        |                       |                                                                                                                        |                       |                                  | Kurtosis                                        | $\bar{k} = 1.416$                                    | Distribution is normal                         |
|                                                                                                                        |                       | 2. Comparison of Occurrence of Clusters by Date (Two Sample t-test between percents)                                   | Statistics Calculator | CellMask                         | Skew                                            | $\bar{s} = 0.324$                                    | Distribution is normal                         |
|                                                                                                                        |                       |                                                                                                                        |                       |                                  | Kurtosis                                        | $\bar{k} = 0.253$                                    | Distribution is normal                         |
|                                                                                                                        |                       | 3. Comparison of Occurrence of $\beta 1$ Clusters vs CellMask Clusters (One Sample t-test between Percents)            | Statistics Calculator | CellMask                         | $\beta 1$                                       | p > 0.05                                             |                                                |
| CellMask                                                                                                               | p > 0.05              |                                                                                                                        |                       |                                  | All dates are equal                             |                                                      |                                                |
| 3. Comparison of Occurrence of $\beta 1$ Clusters vs CellMask Clusters (One Sample t-test between Percents)            |                       | Statistics Calculator                                                                                                  | p < 0.0001            |                                  | $\beta 1$ has more clusters                     |                                                      |                                                |
| 4. Comparison of actual vs expected Occurrence of $\beta 1$ and CellMask Clusters (One Sample t-test between Percents) | Statistics Calculator | CellMask                                                                                                               | $\beta 1$             | p < 0.0001                       |                                                 | There are more $\beta 1$ Clusters than expected      |                                                |
|                                                                                                                        |                       |                                                                                                                        | CellMask              | p = 0.0001                       |                                                 | There are more CellMask Clusters than expected       |                                                |

| Data                                                                                                                         | Figure                | Test For (Test Used)                                                                                                              | Software Used         | Test Details ( $\alpha = 0.05$ ) |                                                            |                                                                                        | Meaning of Results                                              |
|------------------------------------------------------------------------------------------------------------------------------|-----------------------|-----------------------------------------------------------------------------------------------------------------------------------|-----------------------|----------------------------------|------------------------------------------------------------|----------------------------------------------------------------------------------------|-----------------------------------------------------------------|
| <b><math>\beta</math>1 vs Talin Clusters at the Bleb Neck - 231</b>                                                          | 5c                    | 1. Determination of Skew and Kurtosis of distributions (Skew and Kurtosis)                                                        | Excel                 | $\beta$ 1                        | Skew                                                       | $\bar{s} = 0.682$                                                                      | Distribution is normal                                          |
|                                                                                                                              |                       |                                                                                                                                   |                       |                                  | Kurtosis                                                   | $\bar{k} = 1.003$                                                                      | Distribution is normal                                          |
|                                                                                                                              |                       |                                                                                                                                   |                       | Talin                            | Skew                                                       | $\bar{s} = 0.906$                                                                      | Distribution is normal                                          |
|                                                                                                                              |                       |                                                                                                                                   |                       |                                  | Kurtosis                                                   | $\bar{k} = 1.604$                                                                      | Distribution is normal                                          |
|                                                                                                                              |                       | 2. Comparison of Occurrence of Clusters by Date (Two Sample t-test between percents)                                              | Statistics Calculator |                                  | $\beta$ 1                                                  | $p > 0.05$                                                                             | All dates are equal                                             |
|                                                                                                                              |                       |                                                                                                                                   |                       |                                  | Talin                                                      | $p > 0.05$                                                                             | All dates are equal                                             |
|                                                                                                                              |                       | 3. Comparison of Occurrence of $\beta$ 1 Clusters vs Talin Clusters (One Sample t-test between Percents)                          | Statistics Calculator |                                  | $p > 0.05$                                                 |                                                                                        | $\beta$ 1 has equal clusters to Talin                           |
|                                                                                                                              |                       | 4. Comparison of actual vs expected Occurrence of $\beta$ 1 and Talin Clusters (One Sample t-test between Percents)               | Statistics Calculator |                                  | $\beta$ 1                                                  | $p < 0.0001$                                                                           | There are more $\beta$ 1 Clusters than expected                 |
|                                                                                                                              |                       |                                                                                                                                   |                       |                                  | Talin                                                      | $p = 0.0001$                                                                           | There are more Talin Clusters than expected                     |
|                                                                                                                              |                       | 5. Comparison of actual vs expected Occurrence of $\beta$ 1 and Talin Co-clusters (One Sample t-test between Percents)            | Statistics Calculator |                                  | $p = 0.0025$                                               |                                                                                        | There are more $\beta$ 1 and Talin Co-clusters than expected    |
| <b><math>\beta</math>1 vs Vinculin Clusters at the Bleb Neck - 231</b>                                                       | 5c                    | 1. Determination of Skew and Kurtosis of distributions (Skew and Kurtosis)                                                        | Excel                 | $\beta$ 1                        | Skew                                                       | $\bar{s} = 1.000$                                                                      | Distribution is normal                                          |
|                                                                                                                              |                       |                                                                                                                                   |                       |                                  | Kurtosis                                                   | $\bar{k} = 1.614$                                                                      | Distribution is normal                                          |
|                                                                                                                              |                       |                                                                                                                                   |                       | Vinculin                         | Skew                                                       | $\bar{s} = 1.107$                                                                      | Distribution is normal                                          |
|                                                                                                                              |                       |                                                                                                                                   |                       |                                  | Kurtosis                                                   | $\bar{k} = 2.161$                                                                      | Distribution is normal                                          |
|                                                                                                                              |                       | 2. Comparison of Occurrence of Clusters by Date (Two Sample t-test between percents)                                              | Statistics Calculator |                                  | $\beta$ 1                                                  | $p > 0.05$                                                                             | All dates are equal                                             |
|                                                                                                                              |                       |                                                                                                                                   |                       |                                  | Vinculin                                                   | $p > 0.05$                                                                             | All dates are equal                                             |
|                                                                                                                              |                       | 3. Comparison of Occurrence of $\beta$ 1 Clusters vs Vinculin Clusters (One Sample t-test between Percents)                       | Statistics Calculator |                                  | $p < 0.0001$                                               |                                                                                        | $\beta$ 1 has more clusters than Vinculin                       |
|                                                                                                                              |                       | 4. Comparison of actual vs expected Occurrence of $\beta$ 1 and Vinculin Clusters (One Sample t-test between Percents)            | Statistics Calculator |                                  | $\beta$ 1                                                  | $p < 0.0001$                                                                           | There are more $\beta$ 1 Clusters than expected                 |
|                                                                                                                              |                       |                                                                                                                                   |                       |                                  | Vinculin                                                   | $p > 0.05$                                                                             | There are equal Vinculin Clusters to expected                   |
|                                                                                                                              |                       | 5. Comparison of actual vs expected Occurrence of $\beta$ 1 and Vinculin Co-clusters (One Sample t-test between Percents)         | Statistics Calculator |                                  | $p < 0.0001$                                               |                                                                                        | There are more $\beta$ 1 and Vinculin Co-clusters than expected |
| <b>Active <math>\beta</math>1 vs Inactive <math>\beta</math>1 vs CellMask Clusters at the Bleb Neck - 231</b>                | 6c                    | 1. Determination of Skew and Kurtosis of distributions (Skew and Kurtosis)                                                        | Excel                 | Active $\beta$ 1                 | Skew                                                       | $\bar{s} = 0.608$                                                                      | Distribution is normal                                          |
|                                                                                                                              |                       |                                                                                                                                   |                       |                                  | Kurtosis                                                   | $\bar{k} = 0.533$                                                                      | Distribution is normal                                          |
|                                                                                                                              |                       |                                                                                                                                   |                       | Inactive $\beta$ 1               | Skew                                                       | $\bar{s} = 2.697$                                                                      | Distribution is not normal                                      |
|                                                                                                                              |                       |                                                                                                                                   |                       |                                  | Kurtosis                                                   | $\bar{k} = 11.836$                                                                     | Distribution is not normal                                      |
|                                                                                                                              |                       |                                                                                                                                   |                       | CellMask                         | Skew                                                       | $\bar{s} = 0.217$                                                                      | Distribution is normal                                          |
|                                                                                                                              |                       | Kurtosis                                                                                                                          | $\bar{k} = -0.096$    | Distribution is normal           |                                                            |                                                                                        |                                                                 |
|                                                                                                                              |                       | 2. Comparison of Occurrence of Clusters by Date (Two Sample t-test between percents)                                              | Statistics Calculator |                                  | Active $\beta$ 1                                           | $p > 0.05$                                                                             | All dates are equal                                             |
|                                                                                                                              |                       |                                                                                                                                   |                       |                                  | Inactive $\beta$ 1                                         | $p > 0.05$                                                                             | All dates are equal                                             |
|                                                                                                                              |                       |                                                                                                                                   |                       |                                  | CellMask                                                   | $p > 0.05$                                                                             | All dates are equal                                             |
|                                                                                                                              |                       | 3. Comparison of Occurrence of Active $\beta$ 1 Clusters vs Inactive $\beta$ 1 Clusters (One Sample t-test between Percents)      | Statistics Calculator |                                  | $p = 0.001$                                                |                                                                                        | Active $\beta$ 1 has more clusters than Inactive $\beta$ 1      |
| 4. Comparison of Occurrence of Inactive $\beta$ 1 Clusters vs CellMask Clusters (One Sample t-test between Percents)         | Statistics Calculator |                                                                                                                                   | $p > 0.05$            |                                  | Inactive $\beta$ 1 has equal clusters to CellMask          |                                                                                        |                                                                 |
| 5. Comparison of Occurrence of Active $\beta$ 1 Clusters vs Inactive $\beta$ 1 Clusters (One Sample t-test between Percents) | Statistics Calculator |                                                                                                                                   | $p = 0.011$           |                                  | Active $\beta$ 1 has more clusters than Inactive $\beta$ 1 |                                                                                        |                                                                 |
| 6. Comparison of actual vs expected Occurrence of $\beta$ 1 and CellMask Clusters (One Sample t-test between Percents)       | Statistics Calculator |                                                                                                                                   | Active $\beta$ 1      | $p < 0.0001$                     | There are more Active $\beta$ 1 Clusters than expected     |                                                                                        |                                                                 |
|                                                                                                                              |                       |                                                                                                                                   | Inactive $\beta$ 1    | $p = 0.005$                      | There are more Inactive $\beta$ 1 Clusters than expected   |                                                                                        |                                                                 |
|                                                                                                                              |                       |                                                                                                                                   | CellMask              | $p = 0.004$                      | There are more CellMask Clusters than expected             |                                                                                        |                                                                 |
| <b>Active <math>\beta</math>1 vs Inactive <math>\beta</math>1 against Collagen I Pearson's R Values</b>                      | 6f                    | 1. Comparison of Pearson's R Values between Active $\beta$ 1 and Collagen and Inactive $\beta$ 1 and Collagen (Wilcoxon Rank-Sum) | R                     | $p = 0.0016$                     |                                                            | Active $\beta$ 1 is more correlated with collagen accumulation than inactive $\beta$ 1 |                                                                 |



| Data                      | Figure       | Test For (Test Used)                                                                                                   | Software Used | Test Details ( $\alpha = 0.05$ ) | Meaning of Results     |                            |
|---------------------------|--------------|------------------------------------------------------------------------------------------------------------------------|---------------|----------------------------------|------------------------|----------------------------|
| <b>Collagen Pulling</b>   |              |                                                                                                                        |               |                                  |                        |                            |
| <b>Collagen Density</b>   | 8e           | 1. Data resampling to determine normality (Bootstrap Resampling)                                                       | R             | Cell-Free Gels                   | Distribution is Normal |                            |
|                           |              |                                                                                                                        |               | $\beta 1$ KD                     | Distribution is Normal |                            |
|                           |              |                                                                                                                        |               | Non-Blebby Region                | Distribution is Normal |                            |
|                           |              | 2. Analysis of Density of Collagen I in Bleb Bearing Regions of Cells as compared to other regions (Two Tailed t-test) | R             | Blebby Region                    | Distribution is Normal |                            |
|                           |              |                                                                                                                        |               | Blebby to Non-blebby             | $p < 0.0001$           | Blebby Regions have higher |
|                           |              |                                                                                                                        |               | Blebby to $\beta 1$ KD           | $p < 0.0001$           | Blebby Regions have higher |
| Blebby to Cell Free       | $p < 0.0001$ | Blebby Regions have higher collagen density                                                                            |               |                                  |                        |                            |
| <b>Collagen Alignment</b> | 8f           | 1. Data resampling to determine normality (Bootstrap Resampling)                                                       | R             | Cell-Free Gels                   | Distribution is Normal |                            |
|                           |              |                                                                                                                        |               | $\beta 1$ KD                     | Distribution is Normal |                            |
|                           |              |                                                                                                                        |               | Non-Blebby Region                | Distribution is Normal |                            |
|                           |              | 2. Analysis of Collagen Alignment in Bleb Bearing Regions of Cells as compared to other regions (Two Tailed t-test)    | R             | Blebby Region                    | Distribution is Normal |                            |
|                           |              |                                                                                                                        |               | Blebby to Non-blebby             | $p = 0.0166$           | Blebby Regions have more   |
|                           |              |                                                                                                                        |               | Blebby to $\beta 1$ KD           | $p = 0.0023$           | Blebby Regions have more   |
| Blebby to Cell Free       | $p < 0.0001$ | Blebby Regions have more aligned collagen I                                                                            |               |                                  |                        |                            |
| 468 Refers to MDA-MB-468  |              |                                                                                                                        |               |                                  |                        |                            |
| 231 Refers to MDA-MB-231  |              |                                                                                                                        |               |                                  |                        |                            |

## Supplementary Movies

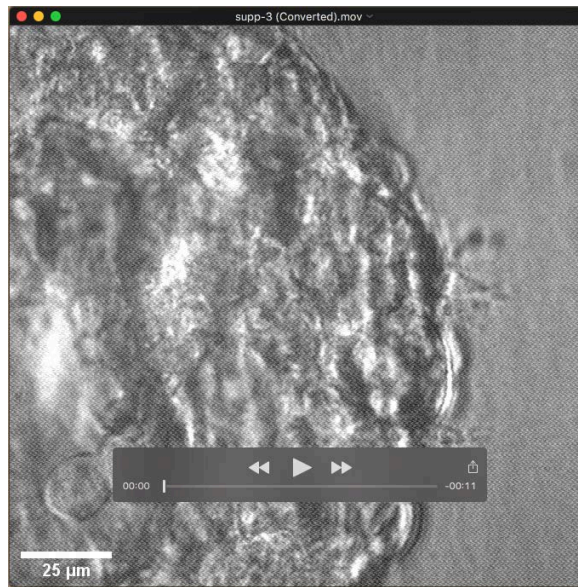

**Movie 1.** Transmitted light images of an MDA-MB-468 spheroid showing round cell invasion into a 1 mg/ml collagen I gel. Images are taken starting at  $t = 2.25$  h after collagen embedding of the spheroid. Frames were taken every 5 minutes. Length of movie is 6.25 hours. Movie is played back at 7 frames/s. Frames from this movie are also shown in Figs. S1c and Fig. 2 in the main text. Scale bar = 25  $\mu\text{m}$ .

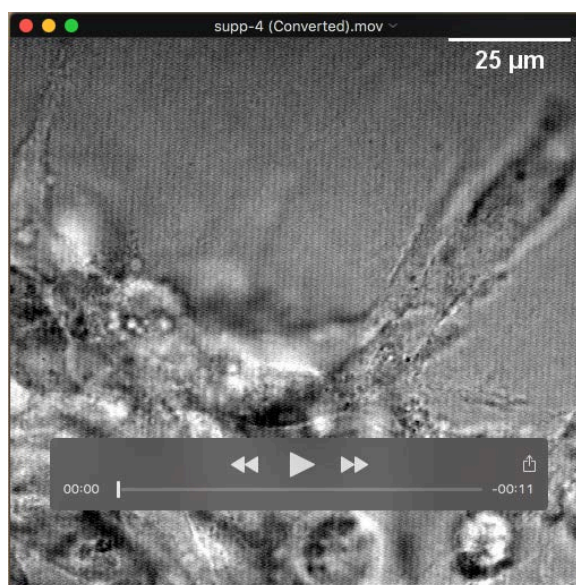

**Movie 2.** Transmitted light images of an MDA-MB-231 spheroid showing invasion of cells with dynamically changing morphology into a 1 mg/ml collagen I gel. Images are taken every 5 minutes starting at  $t = 7.75$  h after collagen embedding of the spheroid. Length of movie is 6.25 hours. Movie is played back at 7 frames/s. Frames from this movie are also shown in Fig. S1d and Fig. 2 in the main text. Scale bar = 25  $\mu\text{m}$ .

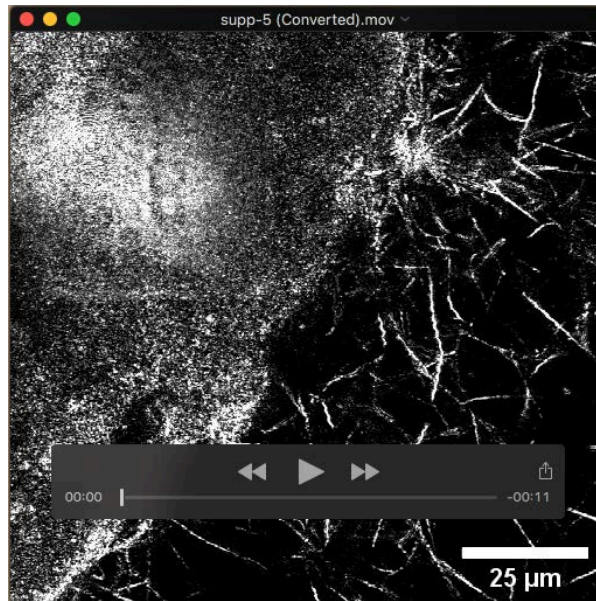

**Movie 3.** Confocal reflectance images of the collagen matrix surrounding the MDA-MB-468 spheroid shown in M1 (at a slightly different location on the spheroid). Locations of apparent lack of collagen I that develop over the time course of the movie are caused primarily by out of plane spheroid and invading cells limiting excitation light reaching the imaging plane. Images are taken every 5 minutes starting at  $t \approx 2.25$  h after collagen embedding of the spheroid. Length of movie is 6.25 hours. Movie is played back at 7 frames/s. Frames from this movie are shown in Fig. 2 in the main text. Scale bar = 25  $\mu\text{m}$ .

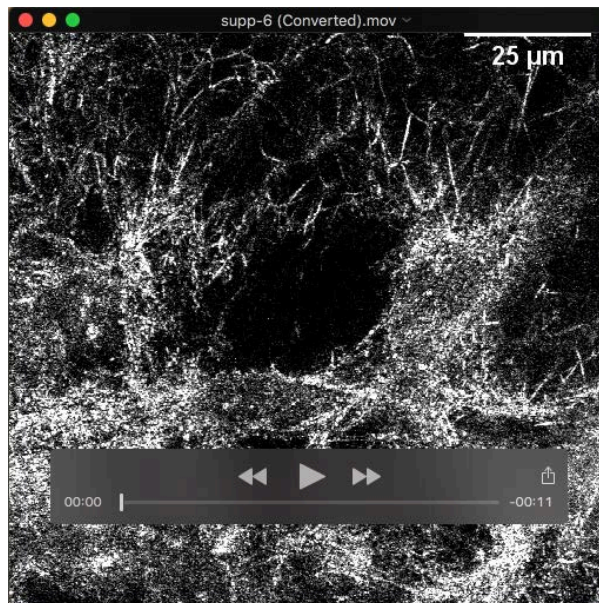

**Movie 4.** Confocal reflectance images of the collagen matrix surrounding the MDA-MB-231 spheroid shown in M2. Locations of apparent lack of collagen I that develop over the time course of the movie are caused primarily by out of plane spheroid and invading cells limiting excitation light reaching the imaging plane. Images are taken every 5 minutes starting at  $t \approx 7.75$  h after collagen embedding of the spheroid. Length of movie is 6.25 hours. Movie is played back at 7 frames/s. Frames from this movie are shown in Fig. 2 in the main text. Scale bar = 25  $\mu\text{m}$ .



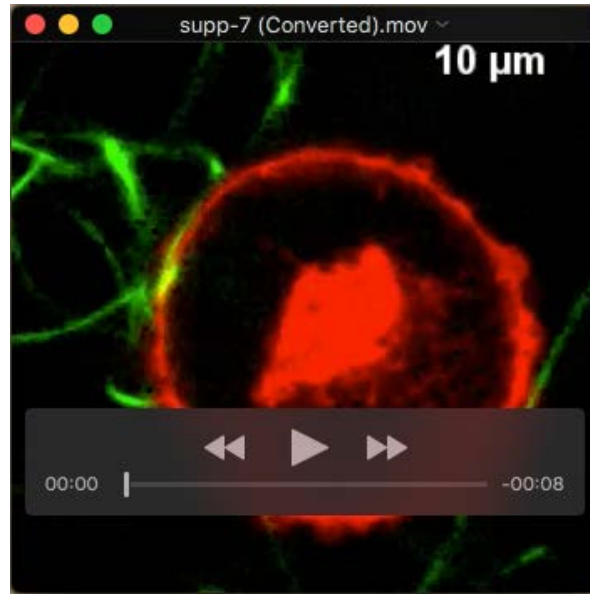

**Movie 5.** MDA-MB-231 cell labeled with (red) CellMask and embedded in (green) fluorescently labeled collagen I imaged shortly after completion of collagen gelation ( $t = 36$  min after collagen embedding). The cell shows initial attachment to and pulling of a collagen fiber by a single bleb (white arrows). Images were taken every 10 seconds. Length of movie is 560 seconds. Movie is played back at 7 frames/s. Frames from this movie are also shown in Fig. 7A in the main text. Scale bar = 10  $\mu\text{m}$ .

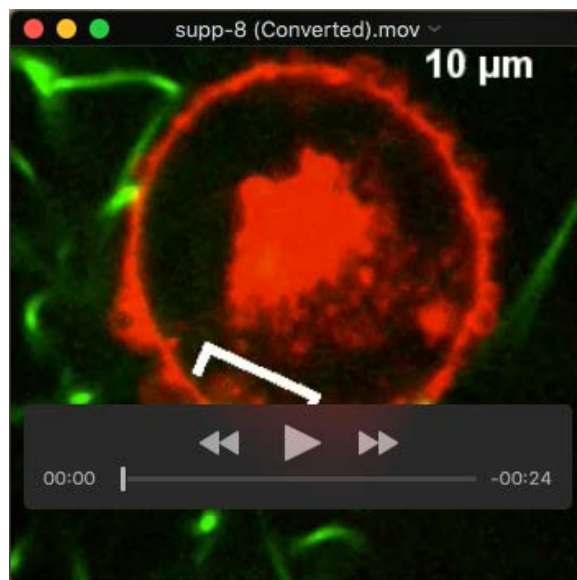

**Movie 6.** MDA-MB-231 cell also shown in V4 shown over a longer time period starting immediately after completion of collagen gelation ( $t = 81$  min after collagen embedding). The cell shows persistent attachment of collagen fibers at the site of multiple recurrent blebs (bracketed region). Images were taken every 10 seconds. Length of movie is 28.5 minutes. Movie is played back at 7 frames/s. Frames from this movie are also shown in Fig. 7B in the main text. Scale bar = 10  $\mu\text{m}$ .

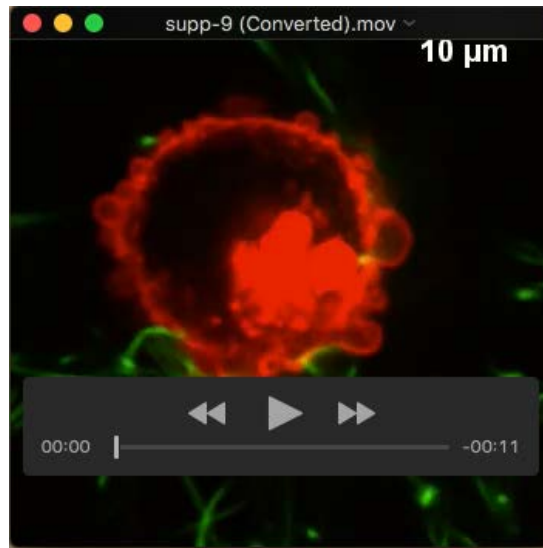

**Movie 7.** MDA-MB-231 cell labeled with (red) CellMask and embedded in (green) fluorescently labeled collagen I imaged starting at  $t = 6$  h after cells were embedded in collagen. The cell shows how bleb formation becomes increasingly confined to a particular cell region over time and how the coincident collagen reorganization is spatiotemporally coordinated with the recurrent bleb formation. Images were taken every 10 seconds. Length of movie is 12.5 minutes. Movie is played back at 7 frames/s. Frames from this movie are also shown in Fig. 8B in the main text (rotated by  $180^\circ$ ). Scale bar =  $10 \mu\text{m}$ .

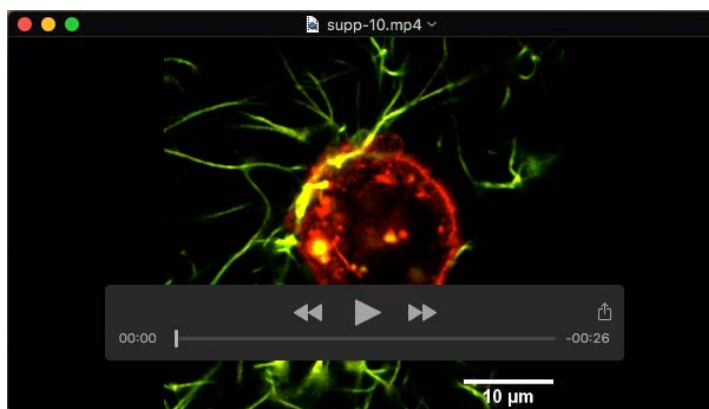

**Movie 8.** MDA-MB-231 cell labeled with (red) CellMask and embedded in (green) fluorescently labeled collagen I imaged starting at  $t = 5.75$  h after cells were embedded in collagen. The cell shows the strongest collagen reorganization at the site of polarized, recurrent clustered blebs. Images were taken every 9.7 seconds. Length of movie is 30 minutes. Movie is played back at 7 frames/s. Frames from this movie are also shown in Fig. 8C,D in the main text. Scale bar =  $10 \mu\text{m}$ .
